# Supplementary material for: Internet Survey of Awareness and Behavior Related to HPV Vaccination in Japan
Source: Vaccines (Basel). 2021 Jan 25;9(2):87. doi: 10.3390/vaccines9020087 (PMC7910902; doi:10.3390/vaccines9020087)
Supplement: Supplementary file 1 [file vaccines-09-00087-s001.pdf]

**Table S1.** Knowledge of cervical cancer screening and HPV vaccination.

| Question                                                                      | Vaccinated ( <i>n</i> = 414) | Unvaccinated ( <i>n</i> = 414) |
|-------------------------------------------------------------------------------|------------------------------|--------------------------------|
| <b>Necessity of regular cancer screening</b>                                  |                              |                                |
| savvy                                                                         | 92 (22.2%)                   | 63 (15.2%)                     |
| vague                                                                         | 127 (30.7%)                  | 122 (29.5%)                    |
| none                                                                          | 195 (47.1%)                  | 229 (55.3%)                    |
| <b>Necessity of cancer screening from the age of 20</b>                       |                              |                                |
| savvy                                                                         | 61 (14.7%)                   | 46 (11.1%)                     |
| vague                                                                         | 77 (18.6%)                   | 92 (22.2%)                     |
| none                                                                          | 276 (66.7%)                  | 276 (66.7%)                    |
| <b>Cervical cancer negatively affects pregnancy</b>                           |                              |                                |
| savvy                                                                         | 228 (55.1%)                  | 192 (46.4%)                    |
| vague                                                                         | 130 (31.4%)                  | 135 (32.6%)                    |
| none                                                                          | 56 (13.5%)                   | 87 (21.0%)                     |
| <b>Cervical cancer may cause death</b>                                        |                              |                                |
| savvy                                                                         | 145 (35.0%)                  | 123 (29.7%)                    |
| vague                                                                         | 124 (30.0%)                  | 130 (31.4%)                    |
| none                                                                          | 145 (35.0%)                  | 161 (38.9%)                    |
| <b>The virus leading to cervical cancer infects during sexual intercourse</b> |                              |                                |
| savvy                                                                         | 92 (22.2%)                   | 65 (15.7%)                     |
| vague                                                                         | 81 (19.6%)                   | 90 (21.7%)                     |
| none                                                                          | 241 (58.2%)                  | 259 (62.6%)                    |
| <b>The virus leading to cervical cancer is HPV</b>                            |                              |                                |
| savvy                                                                         | 56 (13.5%)                   | 43 (10.4%)                     |
| vague                                                                         | 72 (17.4%)                   | 61 (14.7%)                     |
| none                                                                          | 286 (69.1%)                  | 310 (74.9%)                    |
| <b>HPV vaccination is effective for cervical cancer prevention</b>            |                              |                                |
| savvy                                                                         | 89 (21.5%)                   | 37 (8.9%)                      |
| vague                                                                         | 168 (40.6%)                  | 123 (29.7%)                    |
| none                                                                          | 157 (37.9%)                  | 254 (61.4%)                    |
